# Supplementary material for: Comparative Analysis of Single-cell and Single-nucleus RNA-sequencing in a Rabbit Model of Retinal Detachment-related Proliferative Vitreoretinopathy
Source: PubMed Central journal article supplement — Ophthalmol Sci. 2023 May 23;3(4):100335. doi: 10.1016/j.xops.2023.100335 (PMC10365955; doi:10.1016/j.xops.2023.100335), 2023-05-23
Supplement: mmc1.pdf [file mmc1.pdf]

**A**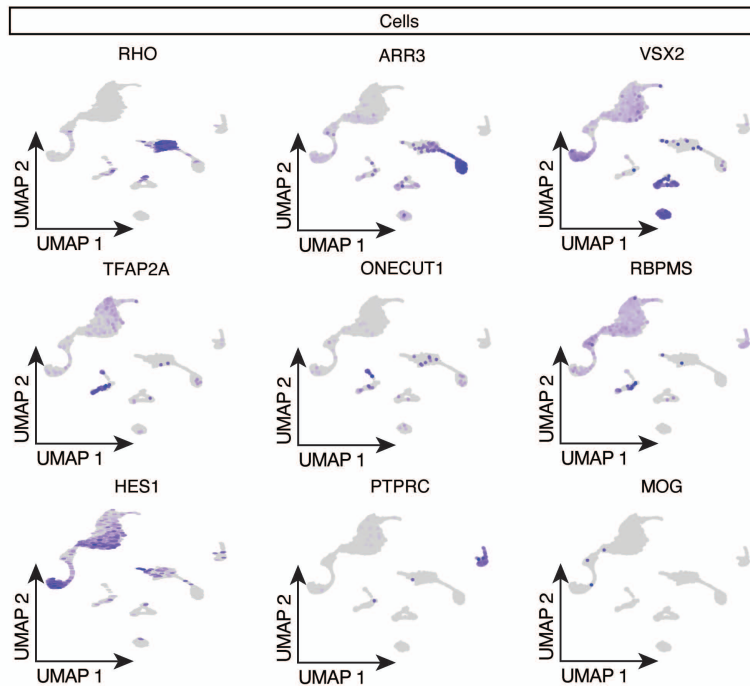**B**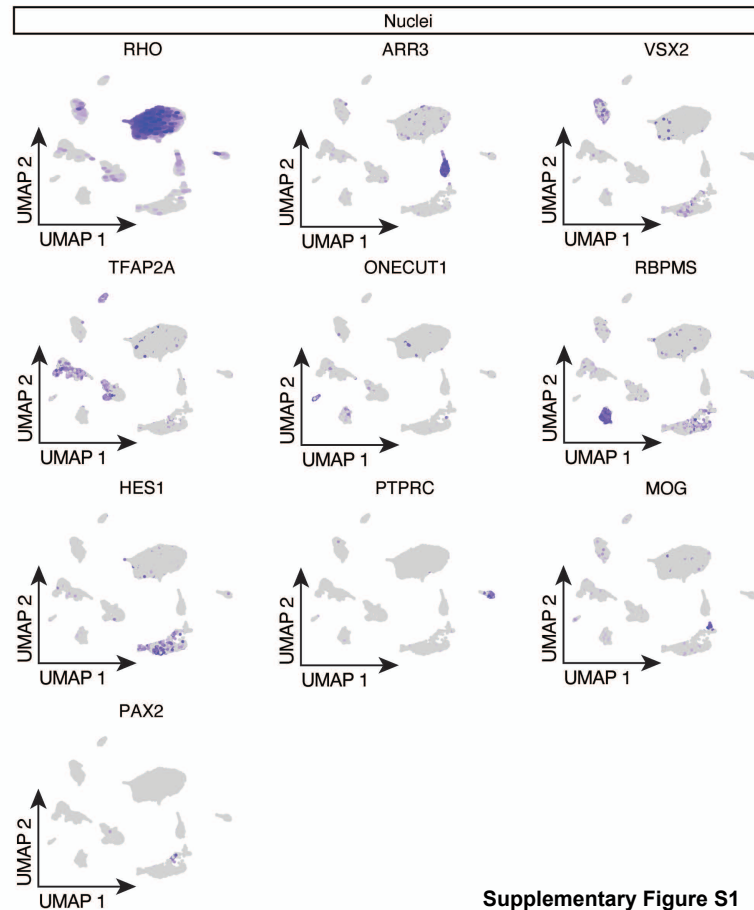

**A**

| Sample Type | Cell Type        | Count | Percentage |
|-------------|------------------|-------|------------|
| Cells       | Rod              | 935   | 16.61      |
|             | Cone             | 530   | 9.41       |
|             | Bipolar          | 693   | 12.31      |
|             | Amacrine         | 247   | 4.39       |
|             | Horizontal       | 60    | 1.07       |
|             | RGC              | 12    | 0.21       |
|             | Müller Glia      | 2,893 | 51.39      |
|             | Microglia        | 257   | 4.56       |
|             | Oligodendrocytes | 3     | 0.05       |
| Nuclei      | Rod              | 3,251 | 57.74      |
|             | Cone             | 220   | 3.91       |
|             | Bipolar          | 359   | 6.38       |
|             | Amacrine         | 901   | 16.00      |
|             | Horizontal       | 52    | 0.92       |
|             | RGC              | 208   | 3.69       |
|             | Müller Glia      | 464   | 8.24       |
|             | Microglia        | 77    | 1.37       |
|             | Oligodendrocytes | 55    | 0.98       |
|             | Astrocyte        | 43    | 0.76       |

**B**

| Cell Type   | Previously Reported Percentage | Cell Percentage | Nuclei Percentage |
|-------------|--------------------------------|-----------------|-------------------|
| Bipolar     | 41.0                           | 17.8            | 20.2              |
| Amacrine    | 32.0                           | 6.3             | 50.7              |
| Horizontal  | 1.5                            | 1.5             | 2.9               |
| Müller Glia | 24.0                           | 74.3            | 26.1              |

**C**

| Cell Type | Previously Reported Percentage | Cell Percentage | Nuclei Percentage |
|-----------|--------------------------------|-----------------|-------------------|
| Rod       | 94.3                           | 63.8            | 93.7              |
| Cone      | 5.7                            | 36.2            | 6.3               |

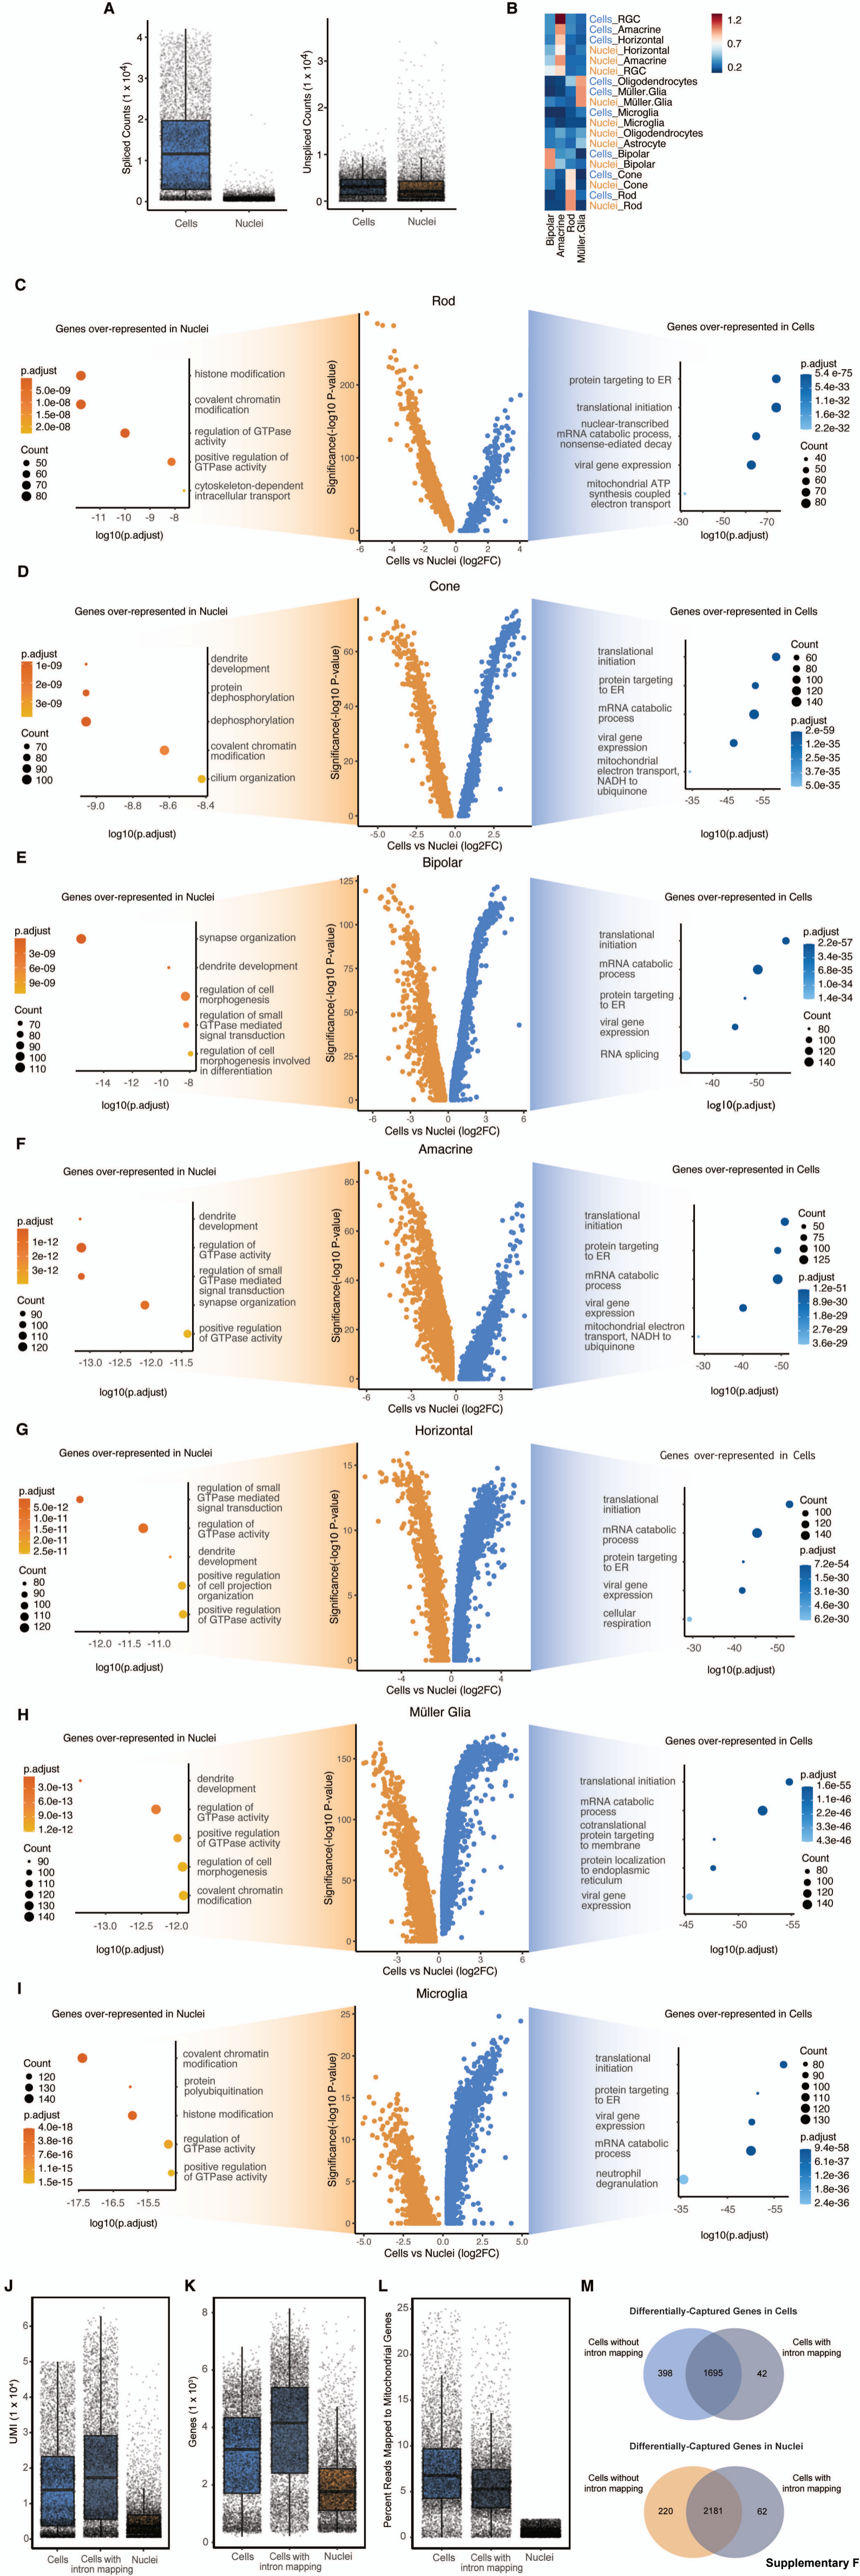

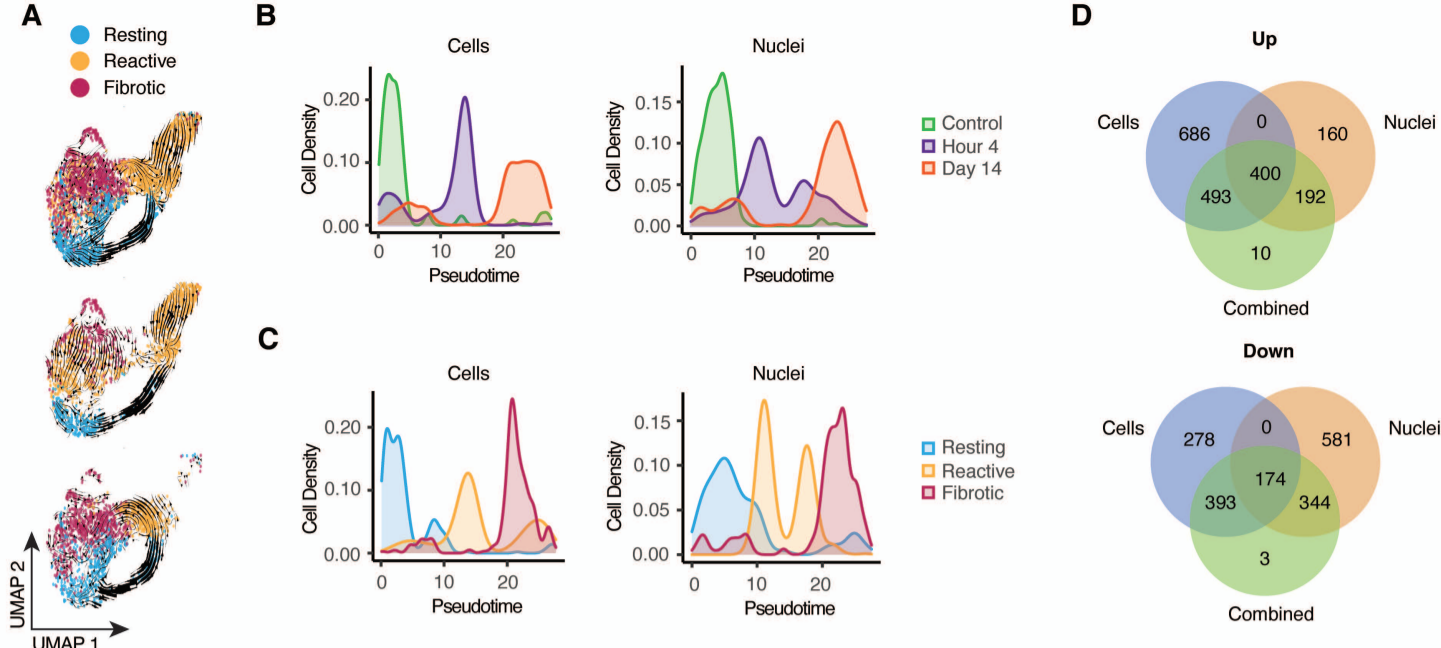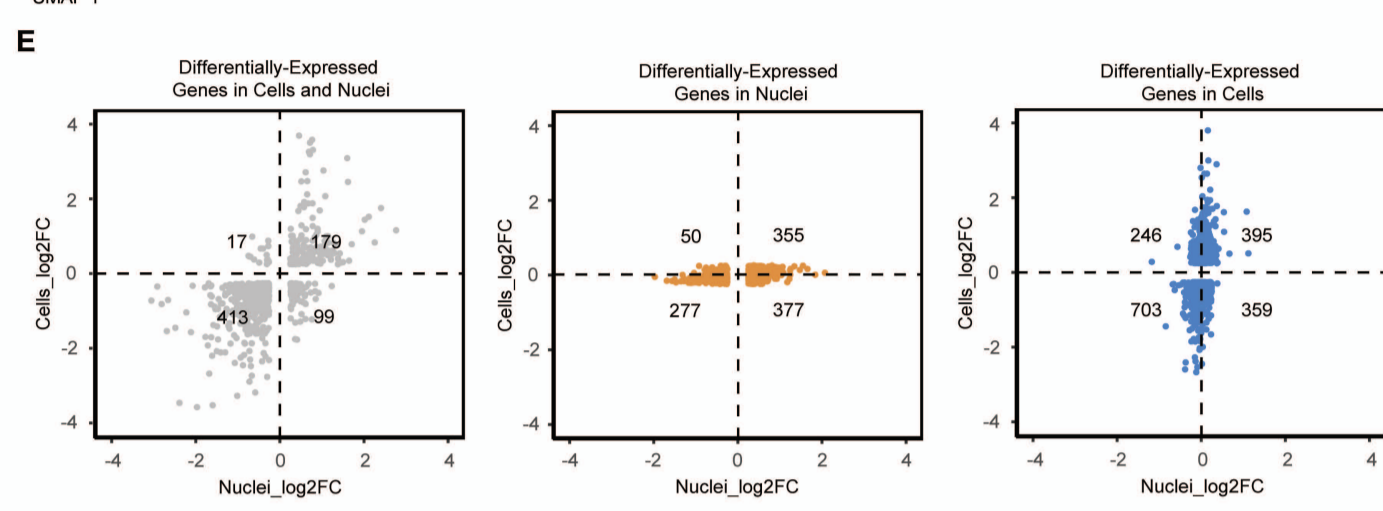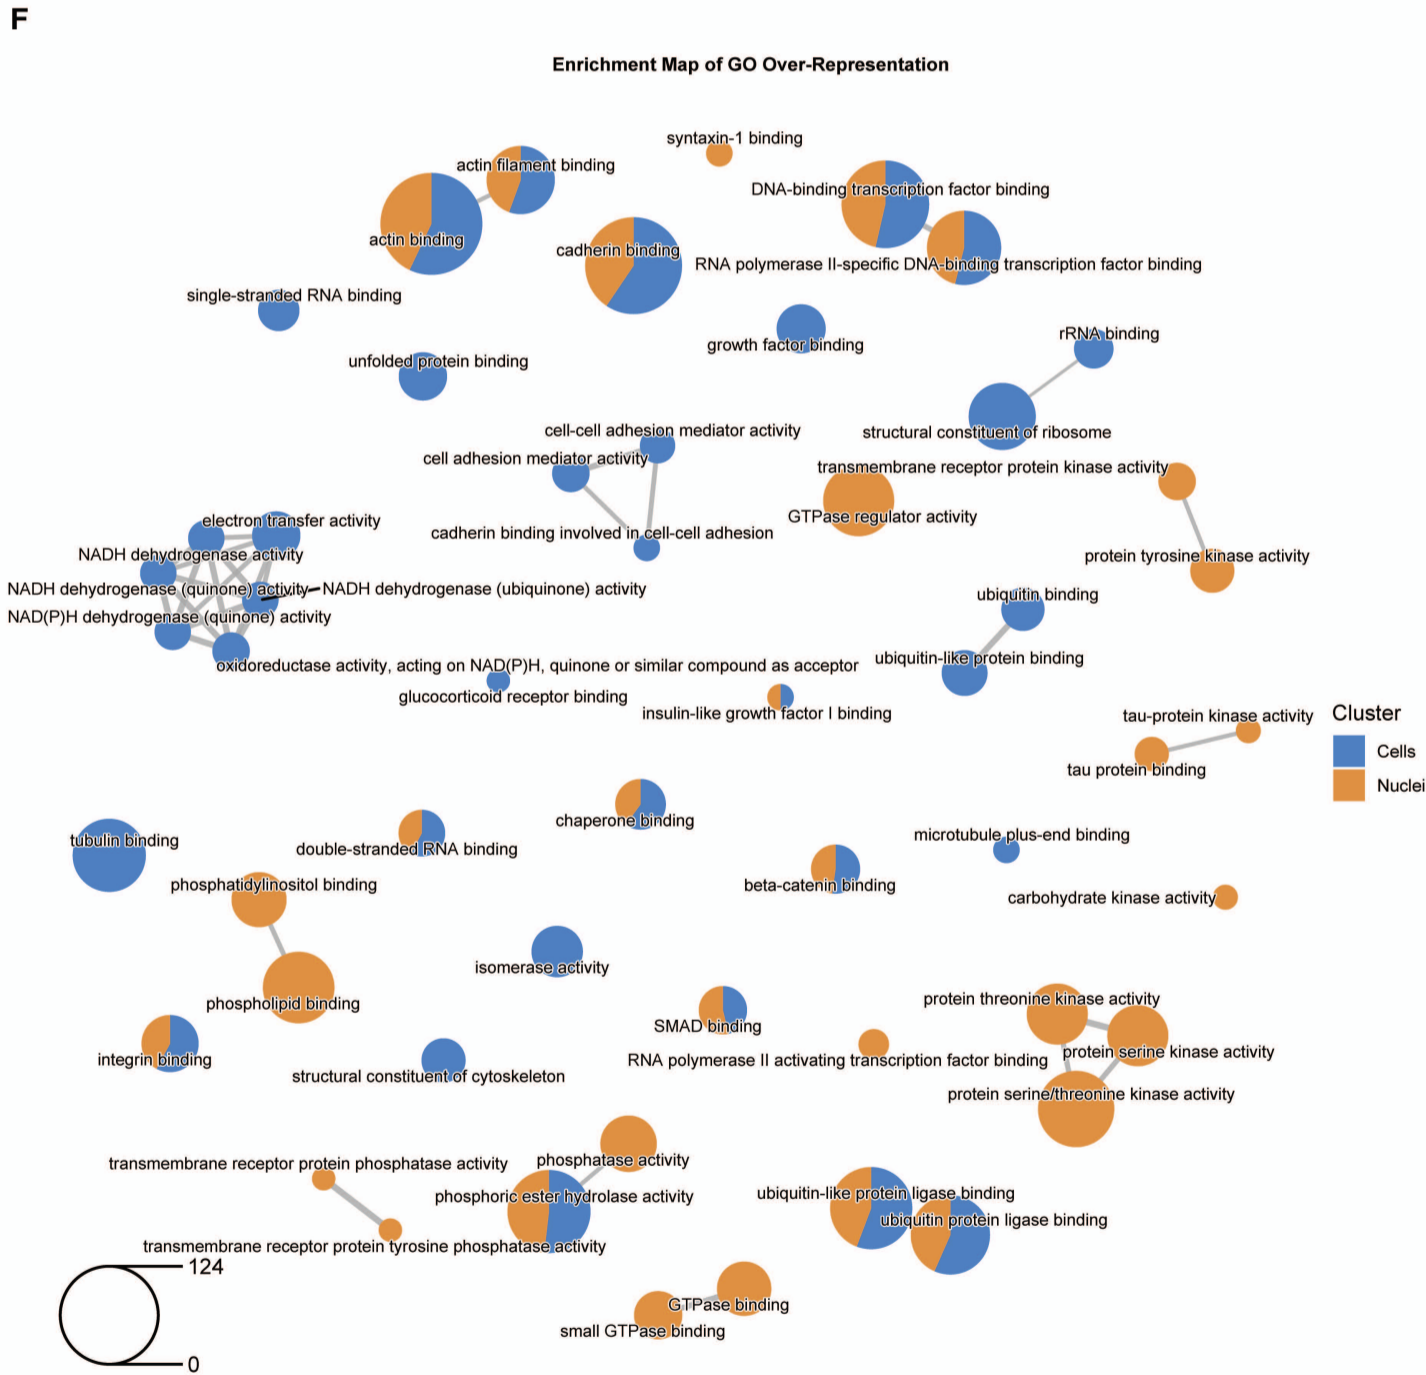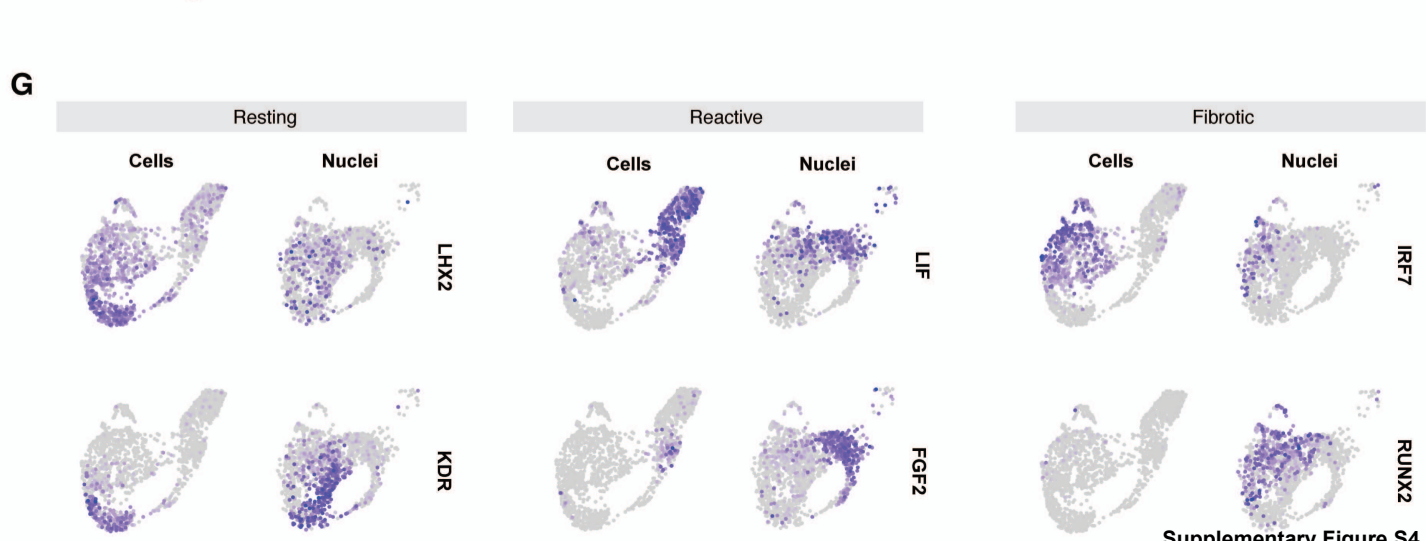

|                              | scR44       | scR46       | scR52       | Average            | scR40       | scR43       | scR47       | scR48       | scR49       | scR50       | scR51       | Average            |
|------------------------------|-------------|-------------|-------------|--------------------|-------------|-------------|-------------|-------------|-------------|-------------|-------------|--------------------|
| <b>Sample Group</b>          | Day14       | Control     | Hr4         |                    | Day14       | Control     | Day14       | Hr4         | Hr4         | Control     | Control     |                    |
| <b>Sample Prep</b>           | Cells       | Cells       | Cells       | Cells              | Nuclei             |
| <b>Number of Reads</b>       | 494,199,203 | 517,378,273 | 413,182,317 | <b>474,919,931</b> | 356,582,275 | 353,830,143 | 475,708,678 | 471,851,840 | 385,617,599 | 423,855,654 | 458,036,175 | <b>417,926,052</b> |
| <b>Sequencing Saturation</b> | 67.9%       | 93.0%       | 73.4%       | <b>78.1%</b>       | 76.2%       | 61.0%       | 76.2%       | 77.0%       | 63.3%       | 72.7%       | 74.1%       | <b>71.5%</b>       |
